# Supplementary material for: A family of [Cu2], [Cu4] and [Cu5] aggregates: alteration of reaction conditions, ancillary bridges and capping anions
Source: Royal Society of Chemistry journal article supplement (doi:10.1039/c8nj02131g), 2018-01-01
Supplement: c8nj02131g1.pdf [file c8nj02131g1.pdf]

## Electronic Supplementary Information

### **Family of [Cu<sub>2</sub>], [Cu<sub>4</sub>] and [Cu<sub>5</sub>] Aggregates: Alteration of Reaction Conditions, Ancillary Bridges and Capping Anions**

Manisha Das,<sup>a</sup> Gavin A. Craig,<sup>b</sup> Daniel Escudero,<sup>c</sup> Mark Murrie,<sup>b</sup> Antonio Frontera,<sup>d</sup> and  
Debashis Ray\*<sup>a</sup>

<sup>a</sup>*Department of Chemistry, Indian Institute of Technology, Kharagpur 721 302, India*

<sup>b</sup>*School of Chemistry, University of Glasgow, Glasgow G12 8QQ, United Kingdom*

<sup>c</sup>*CEISAM UMR CNRS 6230, Université de Nantes, 2 rue de la Houssinière, BP 92208, 44322  
Cedex 3 Nantes, France*

<sup>d</sup>*Department of Chemistry, Universitat de les Illes Balears, Crta de Valldemossa km 7.5, 07122  
Palma de Mallorca (Balears), SPAIN.*

**Chart S1** Observed metal binding modes of  $H_4L1^-$ ,  $OH^-$ ,  $NO_3^-$ ,  $ClO_4^-$  and  $RCO_2^-$

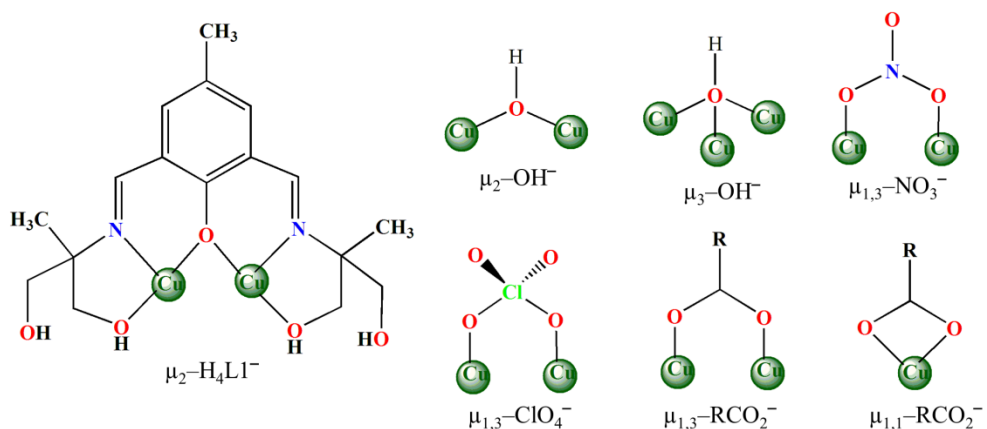

**Scheme S1** Synthesis of ligand  $H_5L1$

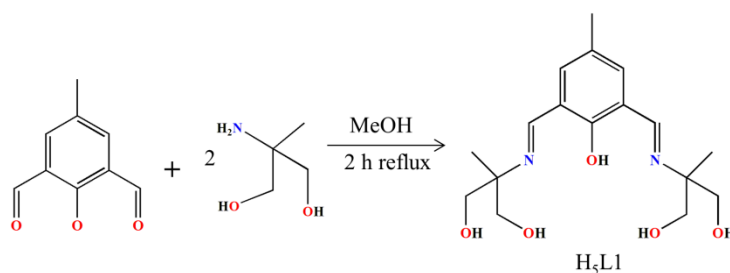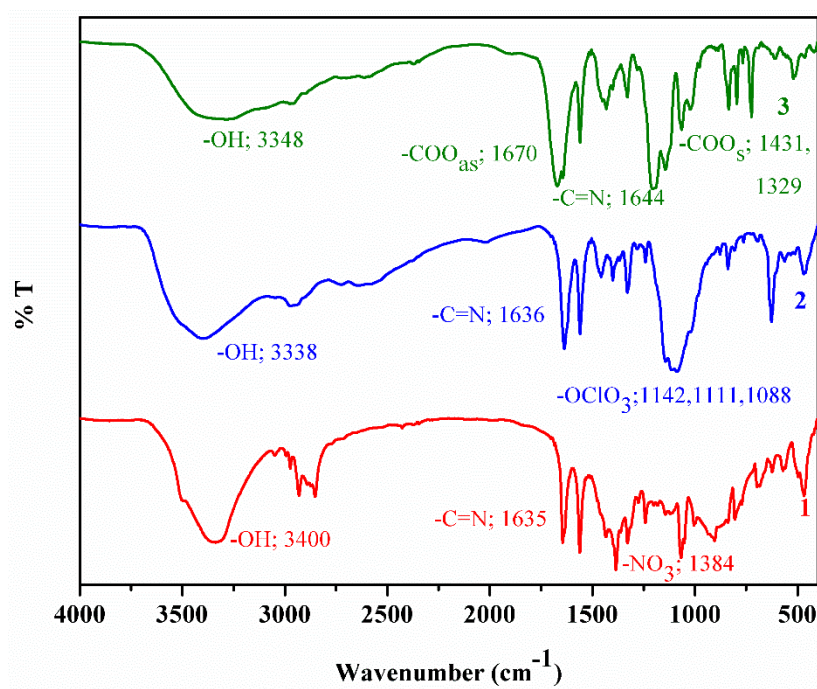

**Figure S1** FTIR Spectra of 1-3

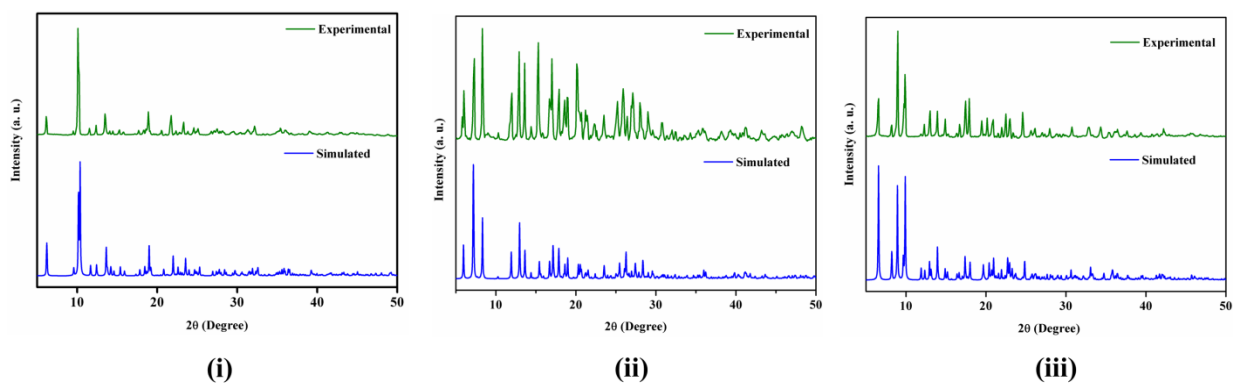

**Figure S2** Experimental (olive) and simulated (blue) PXRD traces of **1** (i), **2** (ii) and **3** (iii)

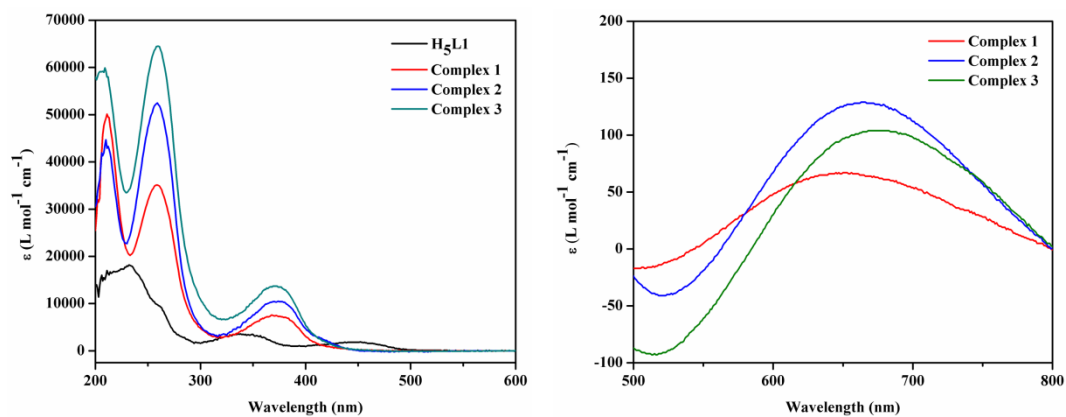

**Figure S3** Charge transfer (left) and d-d transition (right) bands for **1-3**

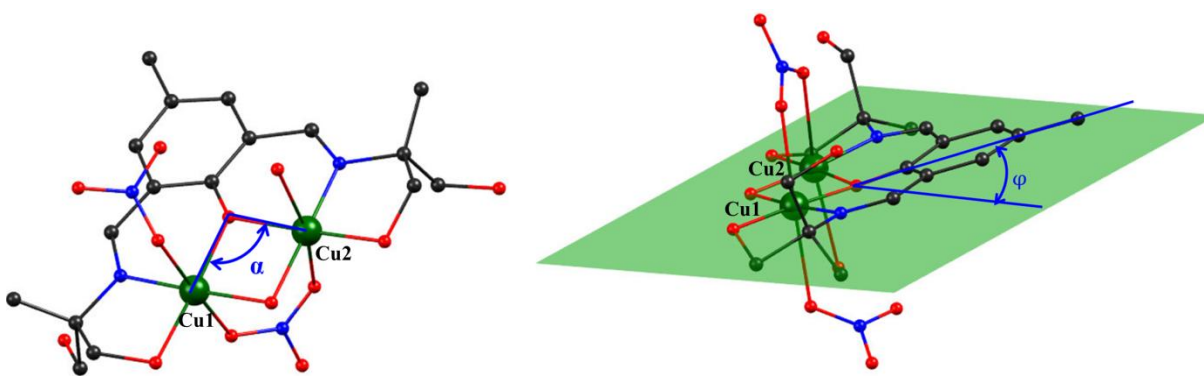

**Figure S4** Coordination core in **1** showing the angles  $\alpha$  and  $\varphi$

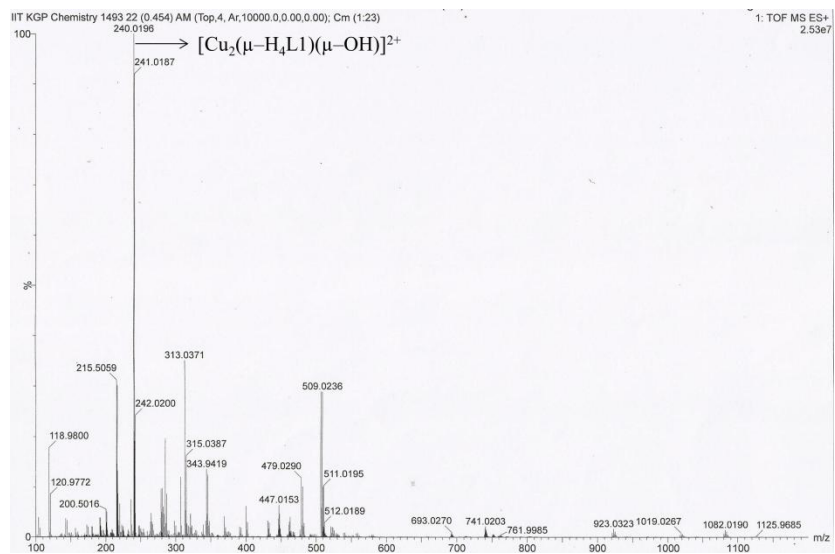

**Figure S5** ESI MS spectra of **1** in MeOH

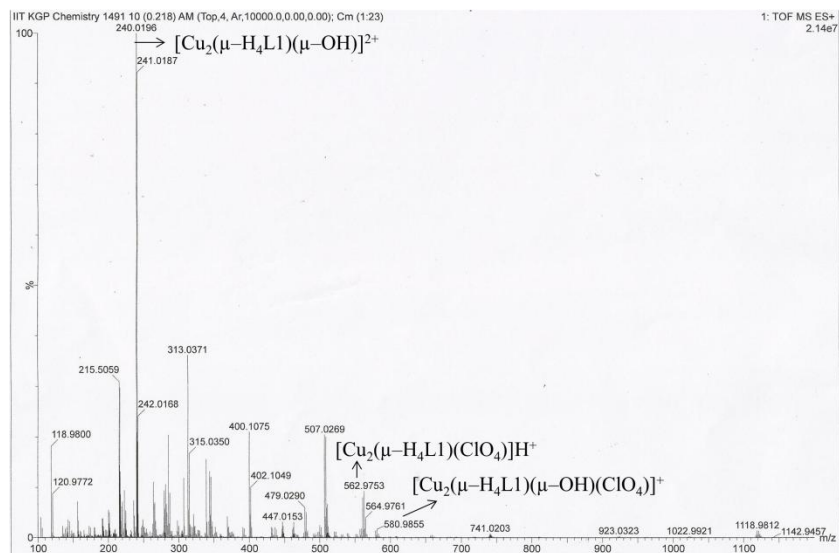

**Figure S6** ESI MS spectra of **2** in MeOH

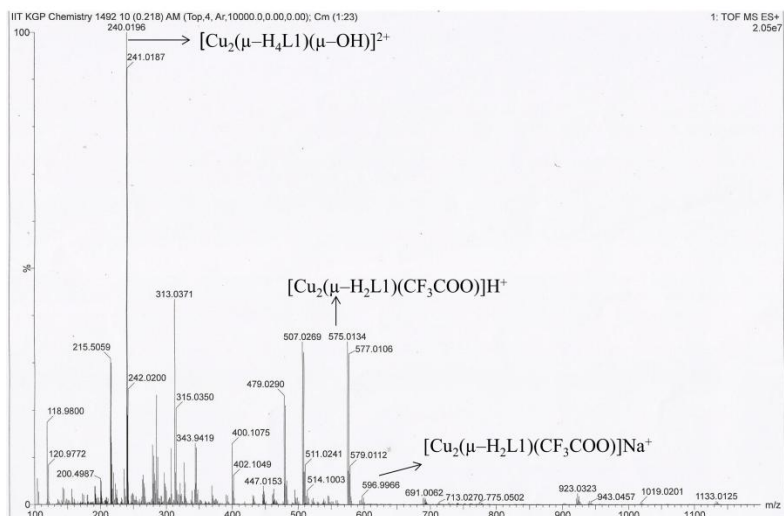

**Figure S7** ESI MS spectra of **3** in MeOH

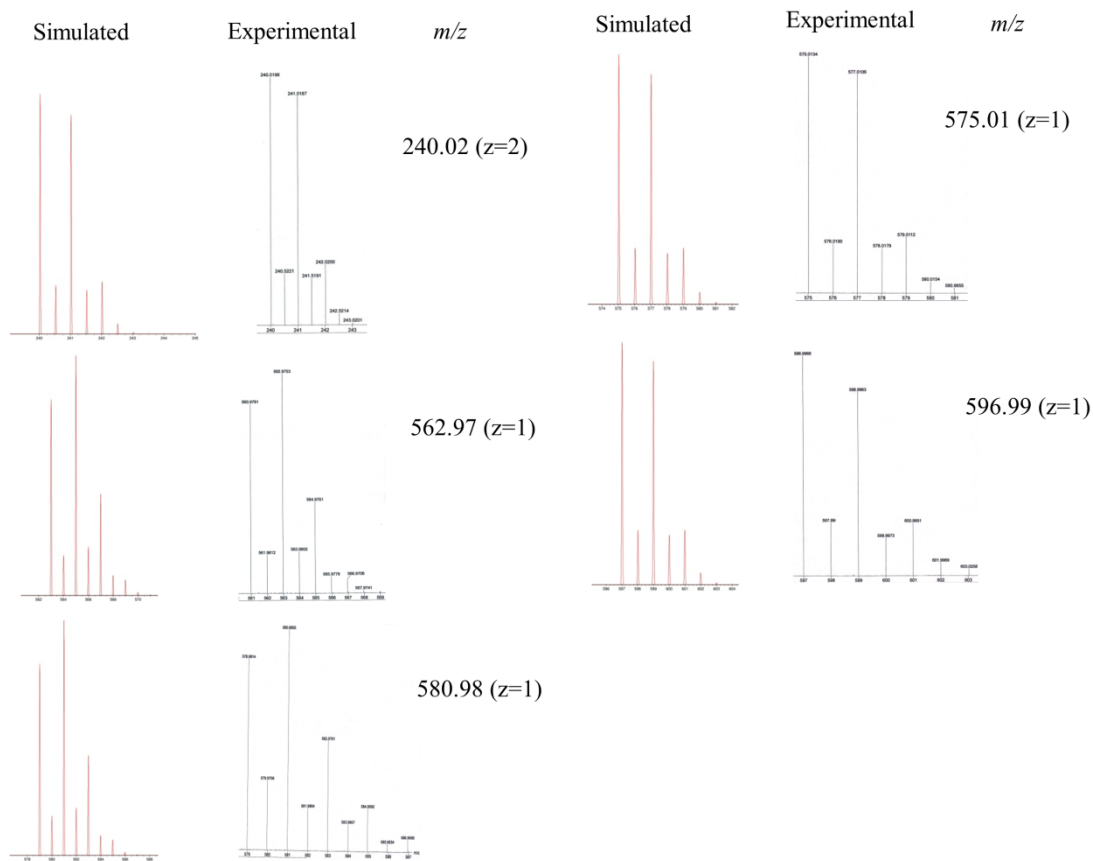

**Figure S8** Experimental and simulated isotopic distribution patterns of the peaks of **1-3**, respectively, obtained using ESI-MS

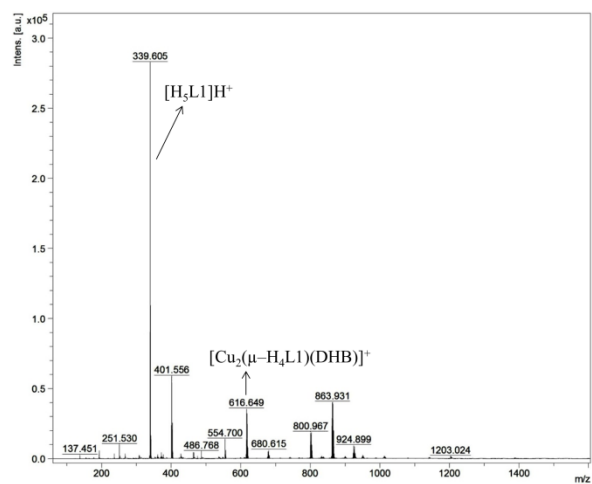

Figure S9 MALDI TOF spectra of **1** in MeOH

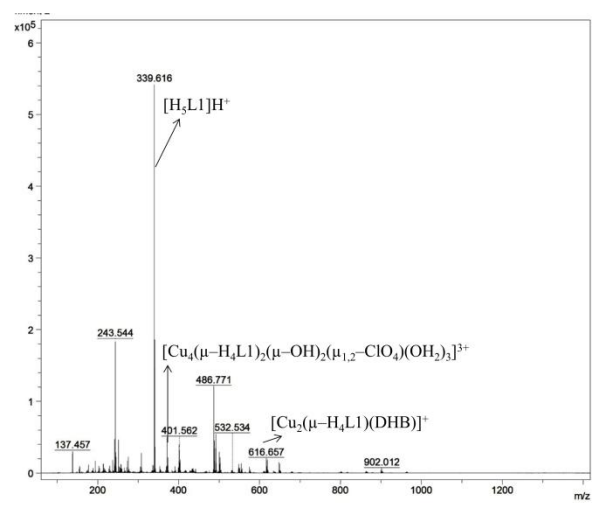

Figure S10 MALDI TOF spectra of **2** in MeOH



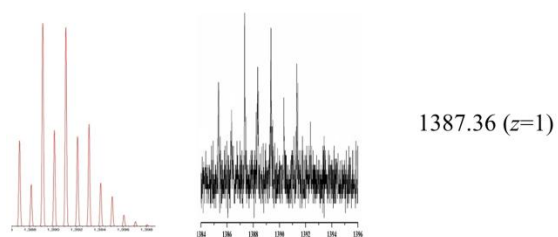

**Figure S12** Experimental and simulated isotropic distribution patterns of the peaks of 1-3, respectively, obtained using MALDI TOF MS

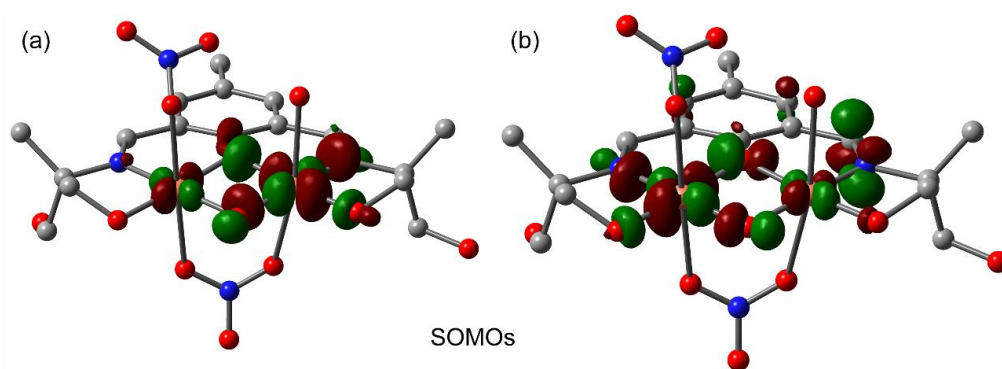

**Figure S13** Graphical representation of the SOMOs of complex 1

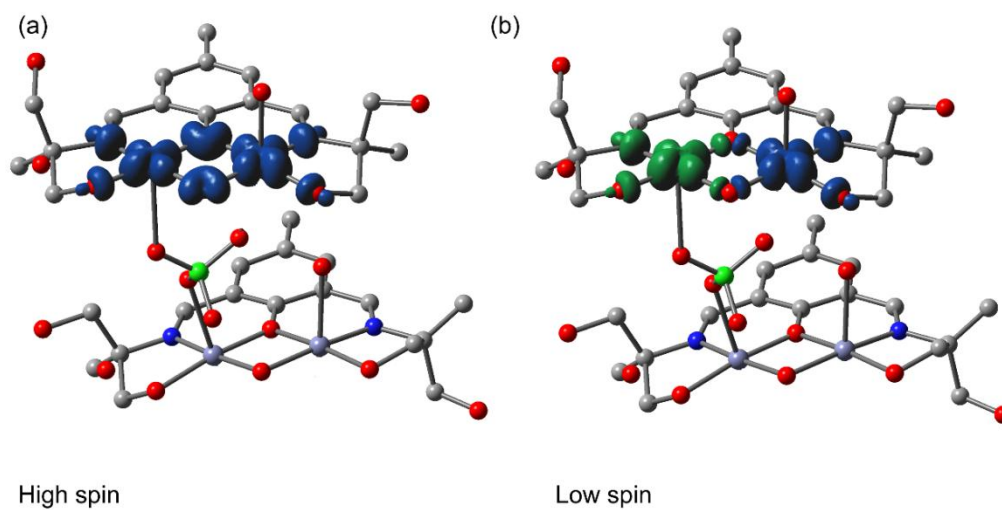

**Figure S14** Representation of spin density (contour  $0.004 \text{ e } \text{Å}^{-3}$ ) at the high spin (a) and low spin (b) configurations of complex 2 (Cu1...Cu2 coupling). Positive spin represented in blue and negative spin in green



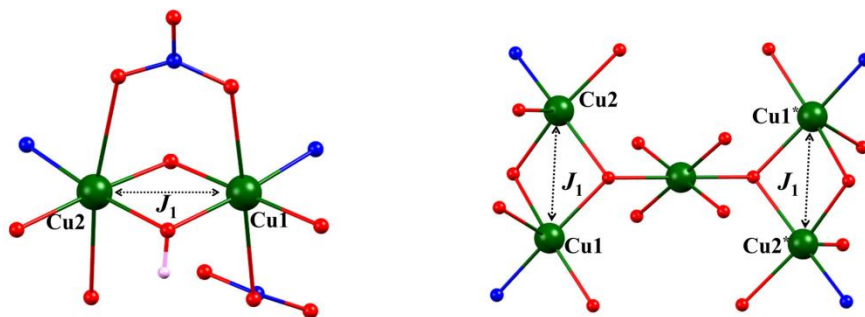

**Figure S15** View for exchange interactions used for fitting process for complex **1** (left) and **3** (right)

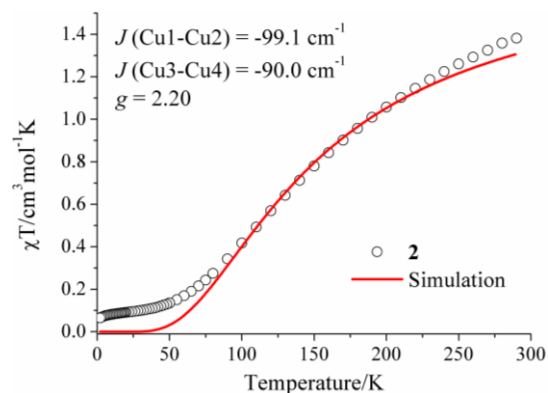

**Figure S16.** Magnetic susceptibility data for compound **2**. The solid line represents a simulation of the data based on the results of the DFT calculations, using the parameters shown in the Figure, where each of the four Cu(II) ions was assumed to have  $g = 2.20$ .

**Table S1** Important bond lengths (Å) and angles (°) in **1**, **2** and **3**

| Bond lengths (Å) |            |           |          |           |            |
|------------------|------------|-----------|----------|-----------|------------|
| Complex <b>1</b> |            |           |          |           |            |
| Cu1 – O1         | 1.929(5)   | Cu1 – N1  | 1.927(6) | Cu2 – O11 | 2.549(6)   |
| Cu1 – O2         | 1.942(5)   | Cu2 – O1  | 1.910(5) | Cu2 – N2  | 1.921(6)   |
| Cu1 – O3         | 1.9732(10) | Cu2 – O2  | 1.958(5) | Cu1 – Cu2 | 2.8967(13) |
| Cu1 – O5         | 2.432(6)   | Cu2 – O4  | 1.945(5) |           |            |
| Cu1 – O8         | 2.475(6)   | Cu2 – O6  | 2.574(6) |           |            |
| Complex <b>2</b> |            |           |          |           |            |
| Cu1 – O1         | 1.921(2)   | Cu2 – N2  | 1.913(2) | Cu4 – O15 | 1.958(2)   |
| Cu1 – O2         | 1.973(2)   | Cu3 – O12 | 1.912(2) | Cu4 – N4  | 1.921(2)   |

|                        |            |            |           |            |           |
|------------------------|------------|------------|-----------|------------|-----------|
| Cu1 – O3               | 1.947(2)   | Cu3 – O13  | 1.955(2)  | Cu1 – Cu2  | 2.9243(8) |
| Cu1 – O11              | 2.354(3)   | Cu3 – O14  | 1.923(2)  | Cu3 – Cu4  | 2.9213(8) |
| Cu1 – N1               | 1.938(2)   | Cu3 – O18  | 2.357(3)  |            |           |
| Cu2 – O1               | 1.915(2)   | Cu3–N3     | 1.938(3)  |            |           |
| Cu2 – O2               | 1.941(2)   | Cu4 – O8   | 2.584(2)  |            |           |
| Cu2 – O4               | 1.943(2)   | Cu4 – O12  | 1.913(2)  |            |           |
| Cu2 – O7               | 2.638(2)   | Cu4 – O13  | 1.943(2)  |            |           |
| <b>Complex 3</b>       |            |            |           |            |           |
| Cu1 – O1               | 1.924(3)   | Cu2 – O2   | 1.995(3)  | Cu3 – O8A  | 2.048(9)  |
| Cu1 – O2               | 1.975(3)   | Cu2 – O3   | 1.964(4)  | Cu1 – Cu2  | 2.9091(8) |
| Cu1 – O4               | 1.947(3)   | Cu2 – O6   | 2.201(3)  |            |           |
| Cu1 – O5               | 2.301(4)   | Cu2 – N1   | 1.939(4)  |            |           |
| Cu1 – N2               | 1.929(4)   | Cu3 – O2   | 1.919(3)  |            |           |
| Cu2 – O1               | 1.939(3)   | Cu3 – O7A  | 1.976(9)  |            |           |
| <b>Bond angles (°)</b> |            |            |           |            |           |
| <b>Complex 1</b>       |            |            |           |            |           |
| O1–Cu1–N1              | 93.9(2)    | O1–Cu2–O6  | 81.5(2)   | O3–Cu1–N1  | 84.3(2)   |
| O1–Cu1–O2              | 82.9(2)    | O2–Cu1–N1  | 175.5(3)  | O3–Cu1–O5  | 93.33(14) |
| O1–Cu1–O3              | 177.26(16) | O2–Cu1–O3  | 99.05(16) | O3–Cu1–O8  | 89.02(14) |
| O1–Cu1–O5              | 88.7(2)    | O2–Cu1–O5  | 87.5(2)   | O4–Cu2–N2  | 86.0(2)   |
| O1–Cu1–O8              | 89.0(2)    | O2–Cu1–O8  | 92.6(2)   | O4–Cu2–O11 | 89.3(2)   |
| O1–Cu2–N2              | 94.3(2)    | O2–Cu2–O11 | 93.7(2)   | O4–Cu2–O6  | 103.1(2)  |
| O1–Cu2–O2              | 83.0(2)    | O2–Cu2–O6  | 85.8(2)   | O5–Cu1–N1  | 89.3(2)   |
| O1–Cu2–O4              | 175.5(2)   | O2–Cu2–N2  | 173.8(3)  | O5–Cu1–O8  | 177.6(2)  |
| O1–Cu2–O11             | 86.2(2)    | O2–Cu2–O4  | 97.2(2)   | O6–Cu2–N2  | 88.4(2)   |
| O6–Cu2–O11             | 167.58(19) | O8–Cu1–N1  | 90.5(2)   | O11–Cu2–N2 | 91.7(2)   |

|                  |            |             |            |              |            |
|------------------|------------|-------------|------------|--------------|------------|
| Cu1-O1-Cu2       | 98.0(2)    | Cu1-O2-Cu2  | 95.9(2)    |              |            |
| <b>Complex 2</b> |            |             |            |              |            |
| O1-Cu1-N1        | 92.59(9)   | O2-Cu2-O7   | 84.59(8)   | O13-Cu3-O18  | 98.45(9)   |
| O1-Cu1-O2        | 81.46(9)   | O3-Cu1-N1   | 85.20(10)  | O14-Cu3-N3   | 86.26(10)  |
| O1-Cu1-O3        | 174.68(9)  | O3-Cu1-O11  | 92.89(12)  | O14-Cu3-O18  | 90.28(10)  |
| O1-Cu1-O11       | 92.15(12)  | O4-Cu2-N2   | 84.72(10)  | O18-Cu3-N3   | 89.07(10)  |
| O1-Cu2-N2        | 93.28(10)  | O4-Cu2-O7   | 89.58(9)   | O8-Cu4-N4    | 93.43(9)   |
| O1-Cu2-O2        | 82.46(9)   | O7-Cu2-N2   | 91.37(9)   | O12-Cu4-N4   | 92.14(9)   |
| O1-Cu2-O4        | 174.21(9)  | O11-Cu1-N1  | 95.87(12)  | O12-Cu4-O13  | 81.79(9)   |
| O1-Cu2-O7        | 95.91(8)   | O12-Cu3-N3  | 93.11(10)  | O12-Cu4-O15  | 170.66(10) |
| O2-Cu1-N1        | 171.80(10) | O12-Cu3-O13 | 81.52(9)   | O12-Cu4-O8   | 99.83(9)   |
| O2-Cu1-O3        | 100.23(9)  | O12-Cu3-O14 | 174.41(9)  | O13-Cu4-N4   | 173.89(10) |
| O2-Cu1-O11       | 90.03(12)  | O12-Cu3-O18 | 95.27(10)  | O13-Cu4-O15  | 99.79(9)   |
| O2-Cu2-N2        | 173.77(10) | O13-Cu3-N3  | 171.10(10) | O13-Cu4-O8   | 88.36(8)   |
| O2-Cu2-O4        | 99.95(9)   | O13-Cu3-O14 | 98.39(9)   | O15-Cu4-N4   | 86.07(10)  |
| O15-Cu4-O8       | 89.44(9)   | Cu1-O2-Cu2  | 96.70(9)   | Cu3-O13-Cu4  | 97.08(9)   |
| Cu1-O1-Cu2       | 99.33(9)   | Cu3-O12-Cu4 | 99.59(9)   |              |            |
| <b>Complex 3</b> |            |             |            |              |            |
| O1-Cu1-N2        | 92.69(15)  | O2-Cu2-O3   | 96.67(15)  | O2-Cu3-O8A*  | 87.5(3)    |
| O1-Cu1-O2        | 82.96(12)  | O2-Cu2-O6   | 87.92(14)  | O7A-Cu3-O7A* | 180.0      |
| O1-Cu1-O4        | 170.10(16) | O3-Cu2-N1   | 85.50(16)  | O7A-Cu3-O8A  | 48.7(4)    |
| O1-Cu1-O5        | 87.34(14)  | O3-Cu2-O6   | 103.06(16) | O7A-Cu3-O8A* | 131.3(4)   |
| O1-Cu2-N1        | 90.63(15)  | O4-Cu1-N2   | 85.62(16)  | O8A-Cu3-O8A* | 180.0      |
| O1-Cu2-O2        | 82.05(13)  | O4-Cu1-O5   | 102.55(15) | Cu1-O1-Cu2   | 97.73(14)  |
| O1-Cu2-O3        | 158.12(18) | O5-Cu1-N2   | 102.67(16) | Cu1-O2-Cu2   | 94.24(14)  |
| O1-Cu2-O6        | 98.73(14)  | O6-Cu2-N1   | 105.53(16) |              |            |
| O2-Cu1-N2        | 169.49(18) | O2-Cu3-O2*  | 180.00     |              |            |

|            |            |             |            |  |  |
|------------|------------|-------------|------------|--|--|
| O2–Cu1–O4  | 97.02(15)  | O2–Cu3–O7A  | 91.7(3)    |  |  |
| O2–Cu1–O5  | 86.74(14)  | O2–Cu3–O7A* | 88.3(3)    |  |  |
| O2–Cu2–N1  | 165.59(17) | O2–Cu3–O8A  | 92.5(3)    |  |  |
| Cu1–O2–Cu3 | 118.44(18) | Cu2–O2–Cu3  | 109.37(18) |  |  |

**Table S2** Hydrogen bonding parameters for **1-3**

| Interactions     | Type of H-bond | D–H (Å)  | D···A (Å) | H···A (Å) | D–H···A (Å) |
|------------------|----------------|----------|-----------|-----------|-------------|
| <b>Complex 1</b> |                |          |           |           |             |
| O1W–H1WA···O11   |                | 0.86(7)  | 2.716(8)  | 1.86(7)   | 176(11)     |
| O2–H2···O1W      |                | 0.85(8)  | 2.838(8)  | 2.01(9)   | 165(10)     |
| O1W–H1WB···O7    |                | 0.85(7)  | 2.845(8)  | 2.00(7)   | 172(8)      |
| O3–H3···O12      |                | 0.84     | 2.609(6)  | 1.78      | 167         |
| O4–H4···O2       |                | 0.85(13) | 2.558(8)  | 1.78(12)  | 151(14)     |
| O11–H11A···O9    | Intra          | 0.85(3)  | 2.782(8)  | 1.95(4)   | 166(6)      |
| O11–H11B···O7    |                | 0.85(6)  | 2.883(9)  | 2.04(6)   | 177(12)     |
| O12–H12···O1W    |                | 0.86(6)  | 2.652(8)  | 1.80(7)   | 175(15)     |
| O13–H13B···O9    |                | 0.82     | 2.778(10) | 2.14      | 134         |
| <b>Complex 2</b> |                |          |           |           |             |
| O1W–H1WA···O22   |                | 0.80(4)  | 2.857(4)  | 2.06(4)   | 175(5)      |
| O2W–H2WA···O30   |                | 0.79(4)  | 2.980(5)  | 2.24(4)   | 156(6)      |
| O3–H3···O13      |                | 0.80(4)  | 2.571(3)  | 1.77(4)   | 175(4)      |
| O2W–H2WB···O5    |                | 0.80(5)  | 2.744(4)  | 1.97(6)   | 163(5)      |
| O4–H4···O16      |                | 0.78(3)  | 2.656(3)  | 1.88(3)   | 178(5)      |
| O1W–H1WB···O26   |                | 0.81(6)  | 2.942(4)  | 2.18(6)   | 159(7)      |
| O5–H5···O1W      |                | 0.83(5)  | 2.785(4)  | 1.96(5)   | 175(6)      |
| O6–H6···O17      |                | 0.77(3)  | 2.808(4)  | 2.04(3)   | 176(4)      |
| O13–H13···O10    | Intra          | 0.78(3)  | 2.818(4)  | 2.06(3)   | 163(3)      |

|              |       |         |          |         |        |
|--------------|-------|---------|----------|---------|--------|
| O14–H14…O2   |       | 0.81(5) | 2.606(3) | 1.81(5) | 168(5) |
| O15–H15…O2W  |       | 0.80(3) | 2.576(5) | 1.79(3) | 173(4) |
| O16–H16…O1W  |       | 0.80(3) | 2.842(4) | 2.05(3) | 170(5) |
| O17–H17…O30  |       | 0.79(4) | 2.871(5) | 2.09(4) | 167(6) |
| O18–H18A…O21 |       | 0.80(4) | 2.822(5) | 2.06(4) | 161(5) |
| O18–H18B…O9  | Intra | 0.81(4) | 2.827(4) | 2.03(4) | 169(6) |
| Complex 3    |       |         |          |         |        |
| O3–H3A…O10   |       | 0.93    | 2.525(5) | 1.84    | 128    |
| O4–H4…O12    |       | 0.93    | 2.552(5) | 2.09    | 110    |
| O10–H10…O9   |       | 0.82    | 2.714(6) | 1.99    | 147    |
| O9–H9…O12    |       | 0.82    | 2.751(5) | 1.96    | 160    |
| O2–H2…O11    |       | 0.69    | 2.724    | 2.031   | 177    |

**Table S3** Atomic spin densities (e) computed for the High and Low spin configuration of compound **2** at the B3LYP/6-31+G\*, Cu1…Cu2 coupling

| Atom Label | High spin | Low Spin |
|------------|-----------|----------|
| Cu1        | 0.68      | -0.68    |
| Cu2        | 0.62      | 0.61     |
| N1         | 0.13      | -0.12    |
| N2         | 0.15      | 0.15     |
| O1         | 0.16      | -0.01    |
| O2         | 0.16      | 0.01     |
| O3         | 0.03      | -0.03    |
| O4         | 0.04      | 0.03     |

**Table S4.** Atomic spin densities (e) computed for the High and Low spin configuration of compound **2** at the B3LYP/6-31+G\*, Cu3…Cu4 coupling

| Atom Label | High spin | Low Spin |
|------------|-----------|----------|
| Cu3        | 0.66      | -0.66    |
| Cu4        | 0.67      | 0.68     |
| N3         | 0.11      | -0.10    |

|     |      |       |
|-----|------|-------|
| N4  | 0.11 | 0.11  |
| O12 | 0.13 | -0.01 |
| O13 | 0.24 | 0.01  |
| O4  | 0.02 | -0.02 |
| O15 | 0.02 | 0.02  |
